# Supplementary material
Source: PubMed Central journal article supplement (PMC6602864)

# Supplementary Figure 1

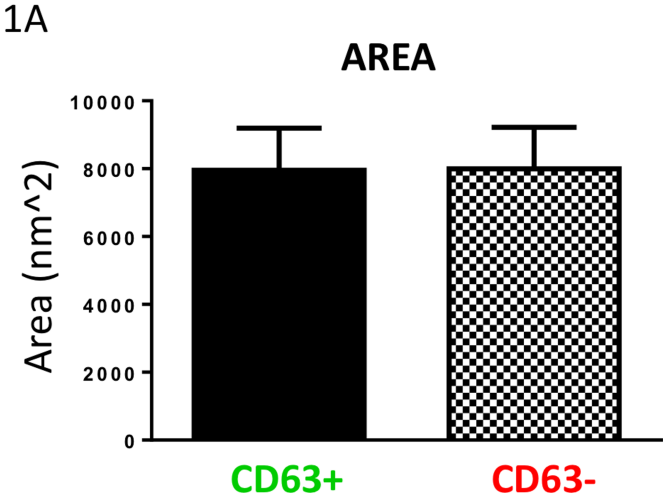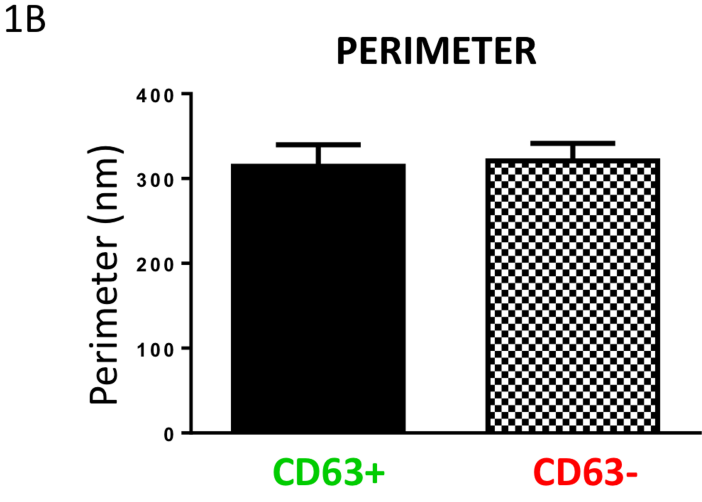

# Supplementary Figure 2

2A

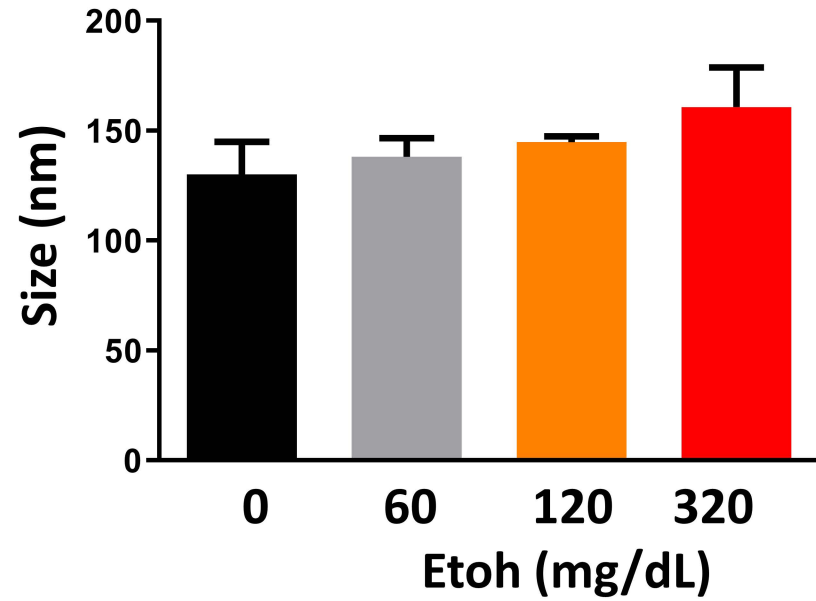

2B

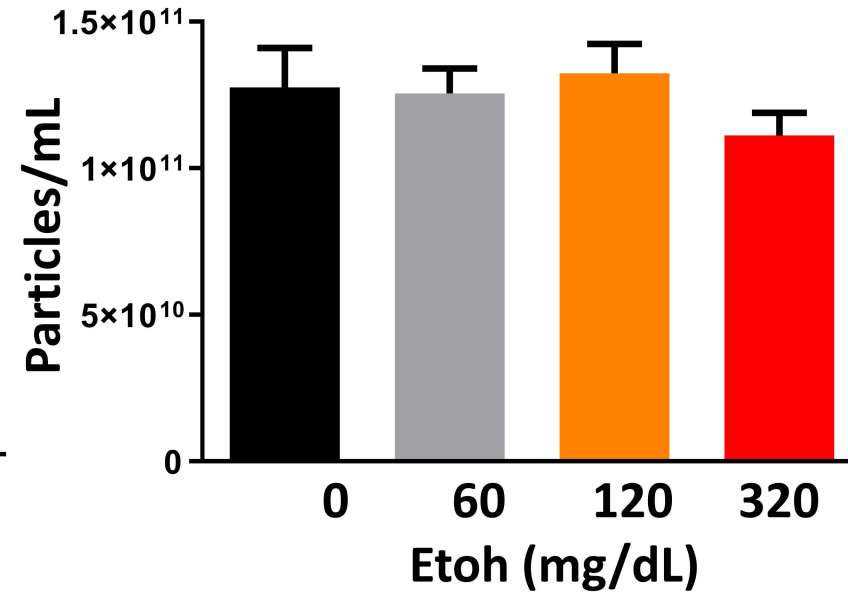

2C

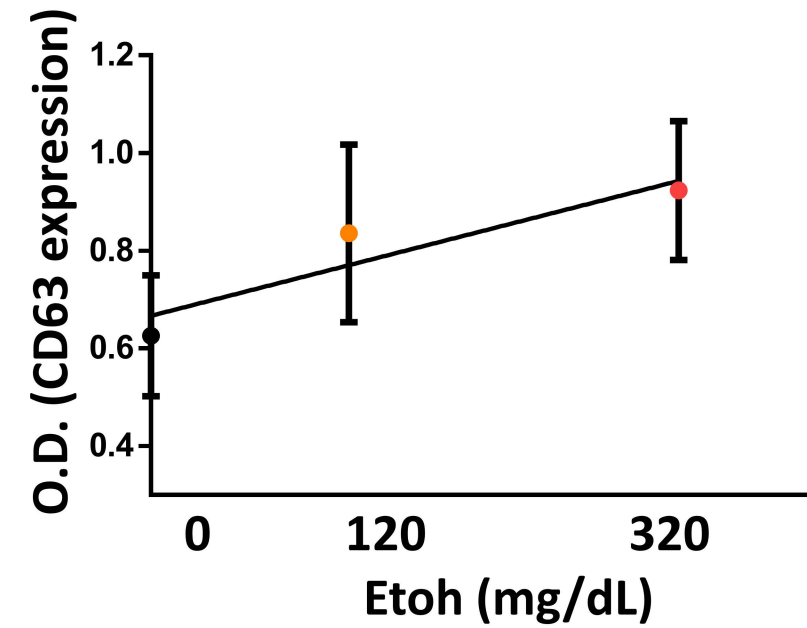

# Supplementary Figure 3

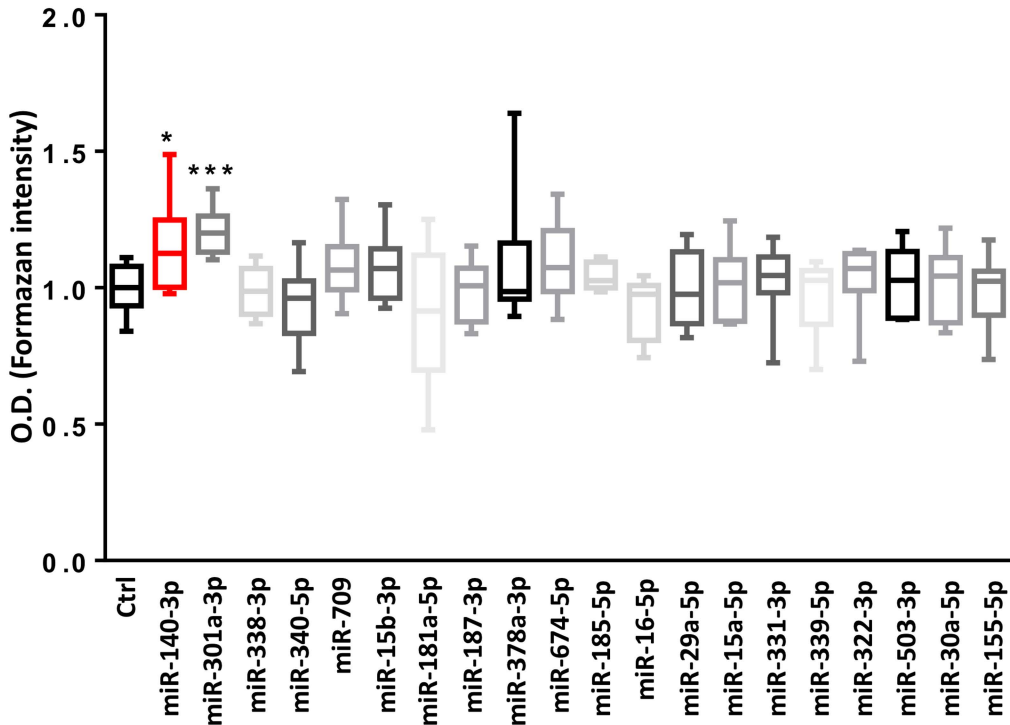

# Supplementary Figure 4

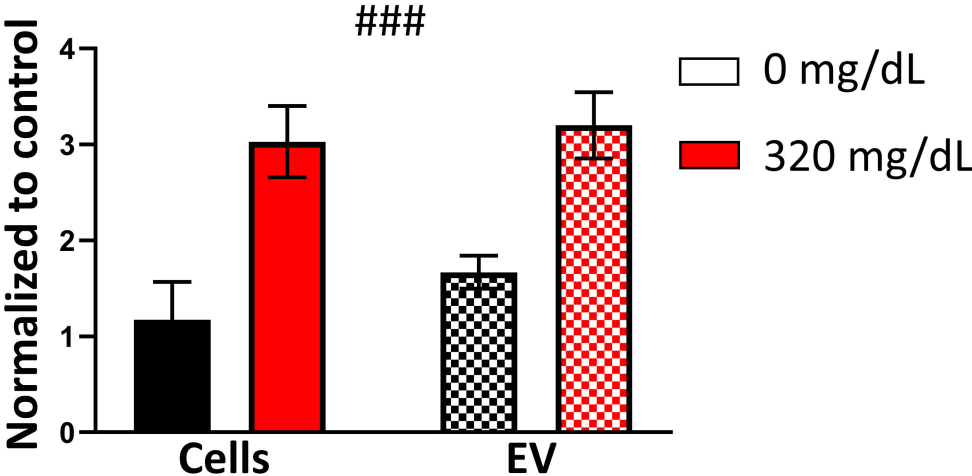

# Supplementary Figure 5

5A

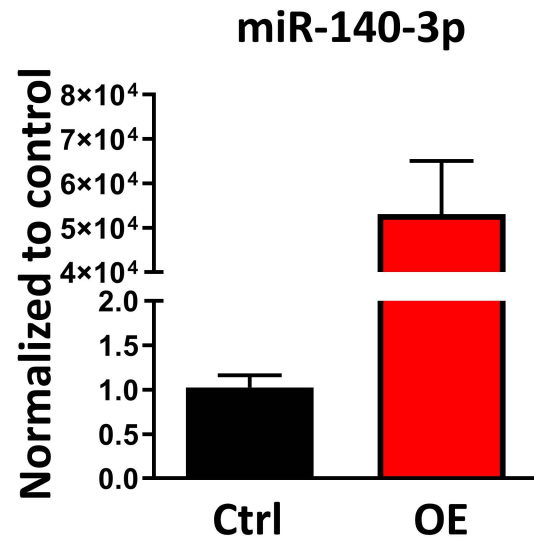

5B

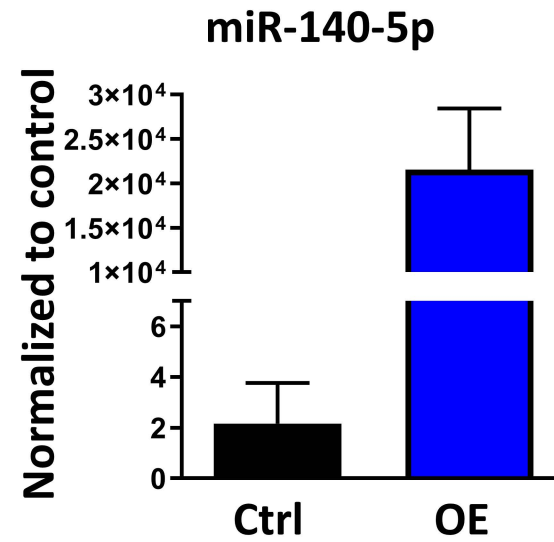

5C

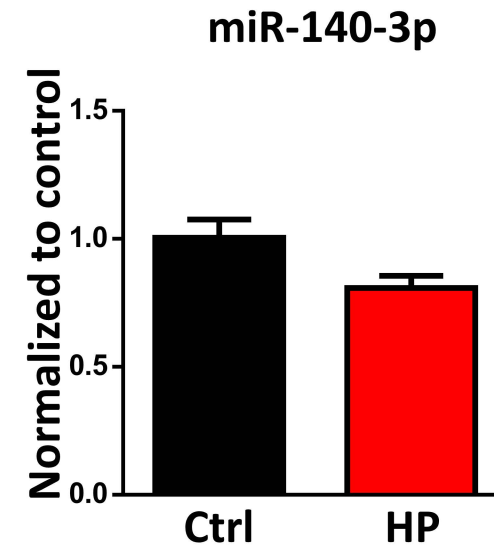

5D

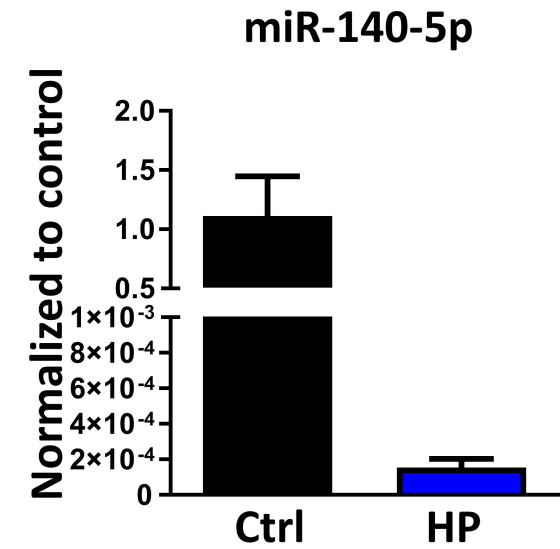

# Supplementary Figure 6

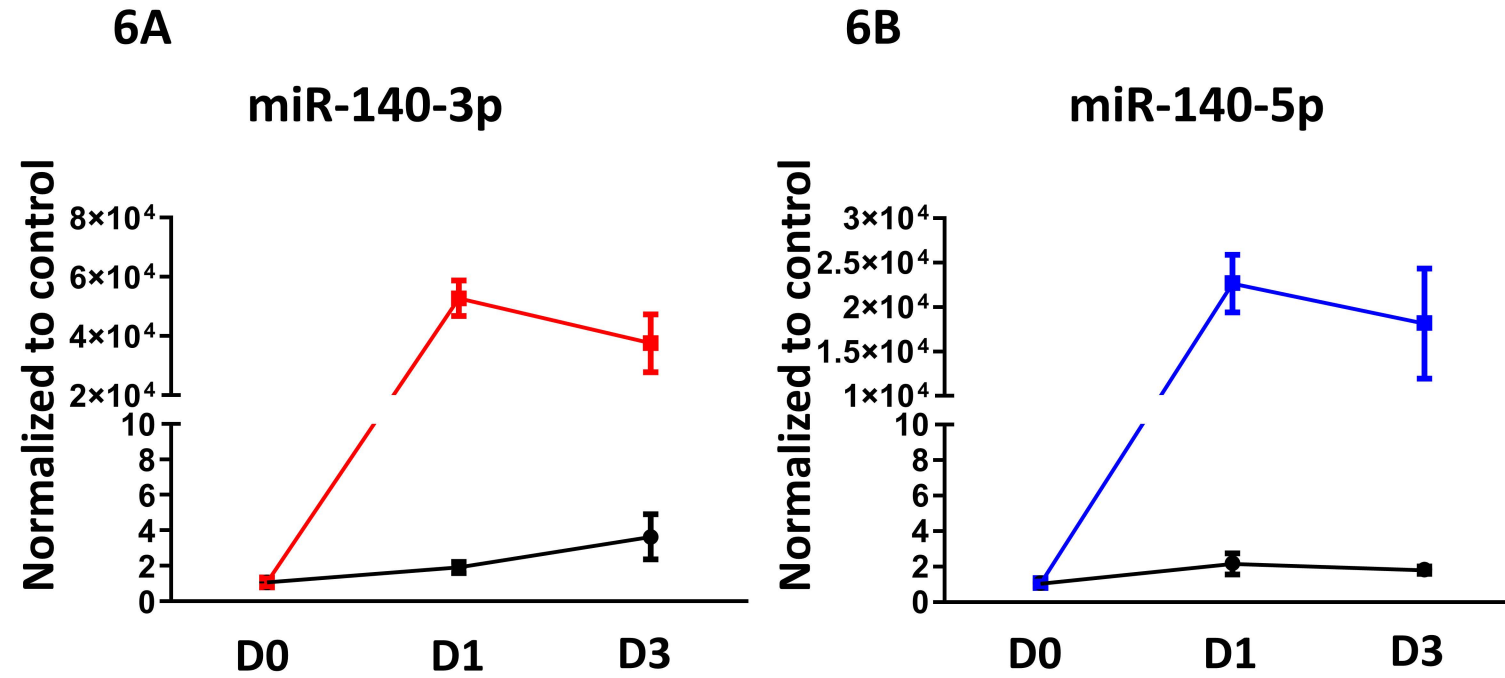

# Supplementary Figure 7

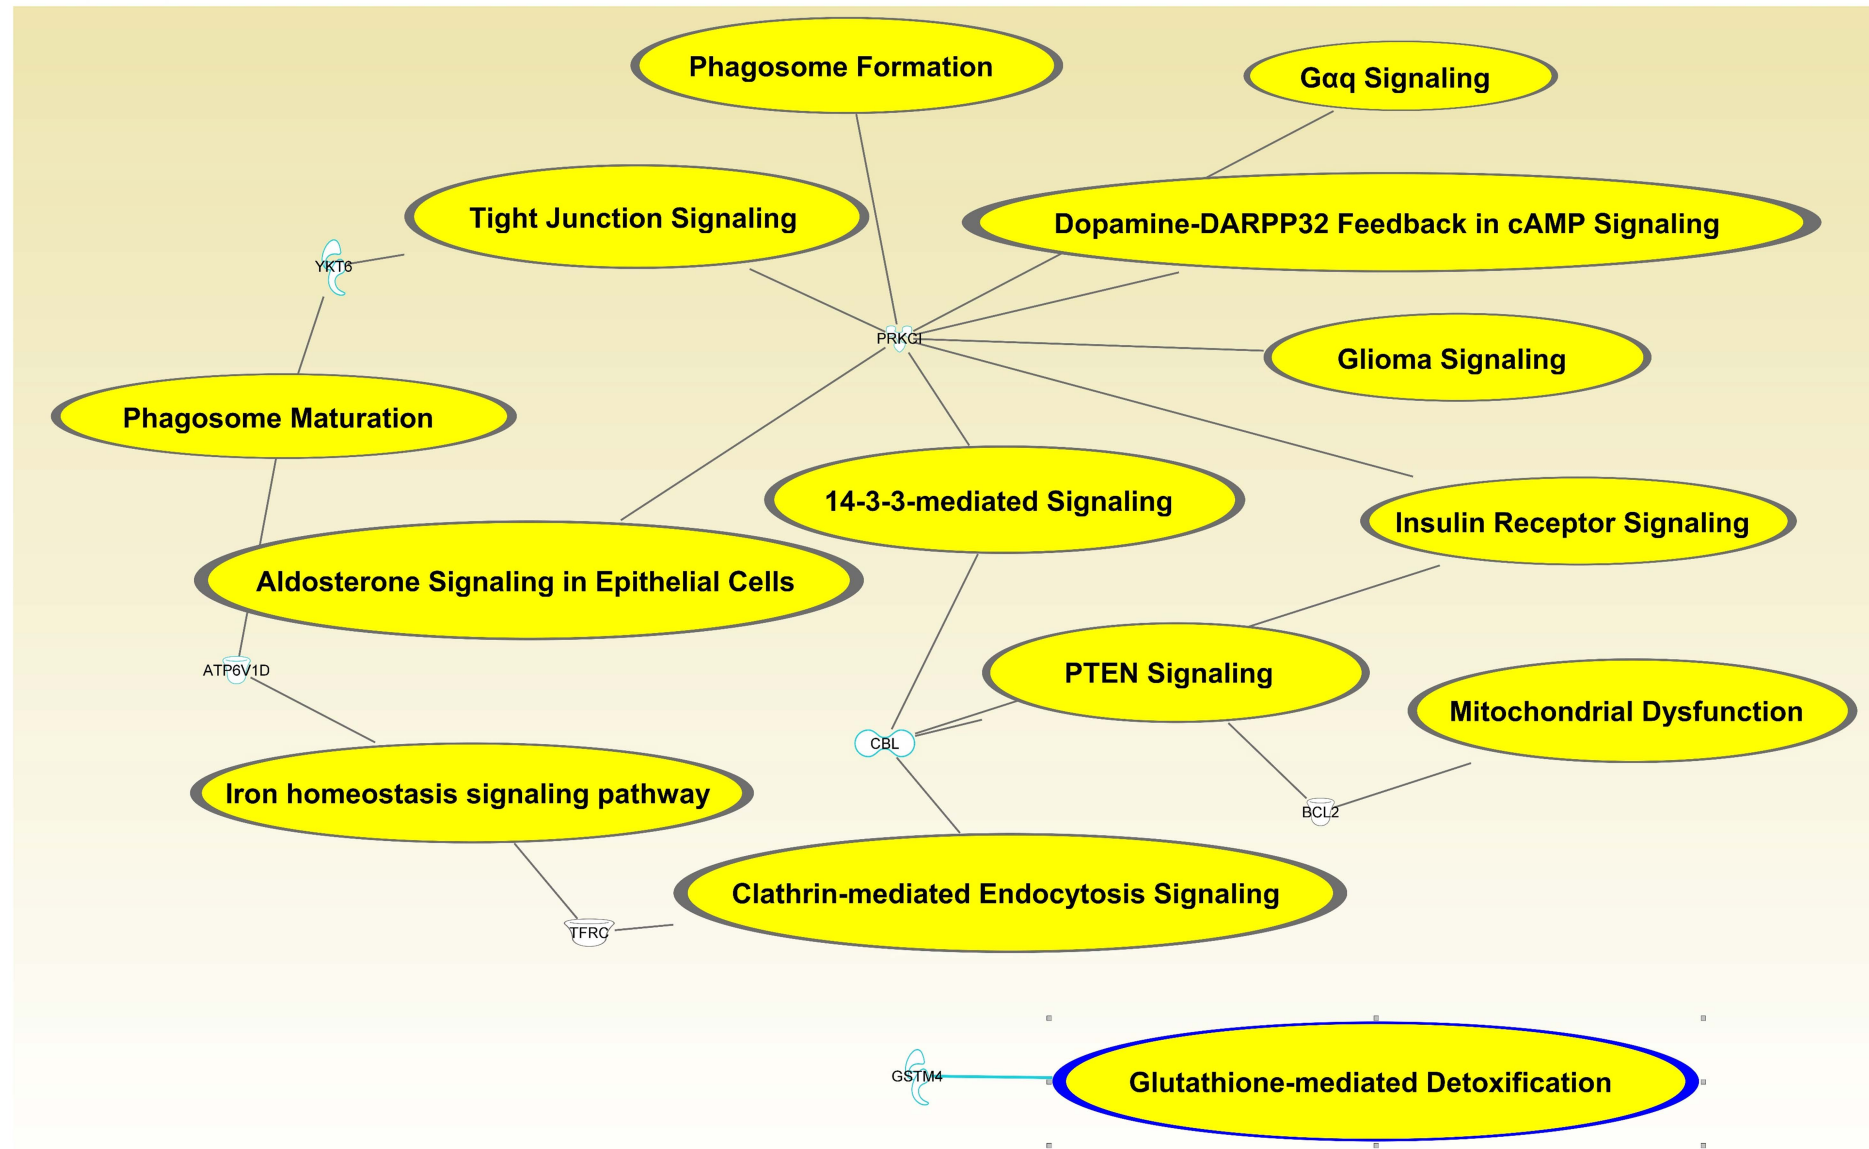

Supplement: NIHMS1024255-supplement-Supp_figS1-7.pdf [file NIHMS1024255-supplement-Supp_figS1-7.pdf]
